# Supplementary material for: Impact of COVID-19 on emergency department attendance in an Australia hospital: a parallel convergent mixed methods study
Source: HighWire-hosted journal article supplement (doi:10.1136/bmjopen-2021-049222), 2021-12-01
Supplement: bmjopen-2021-049222supp001_data_supplement.pdf [file bmjopen-2021-049222supp001_data_supplement.pdf]

**Supplementary material A: Criteria used for HealthLinks prediction algorithm**

- Age
- Number of unplanned admissions in the past six months
- Number of emergency department visits in the past three months
- Hospital stay being caused by selected chronic progressive condition(s) and multiple co-morbidities such as asthma, kidney disease, chronic obstructive pulmonary disease, rheumatoid arthritis, hepatitis
- Smoking status
- Place of residence (residential aged care or private residence).

Each criterion provides a weighted value and inclusion into Health Links is triggered once a points threshold is reached. A strong correlation has been demonstrated between the observed and expected proportions of frequent users, and the model has been found to accurately identify patients who will be admitted three or more times in the following 12 months 32% of the time .

**Supplementary material B: Coefficients of segmented interrupted time series analysis (note, data is centred around COVID impact)**

| term                             | Coefficient | std.error | p.value | Lower CI | Upper CI |
|----------------------------------|-------------|-----------|---------|----------|----------|
| (Intercept)                      | 256.390     | 7.738     | <0.001  | 241.009  | 271.770  |
| Week                             | 0.025       | 0.210     | 0.907   | -0.393   | 0.442    |
| Covid Phase                      | -91.567     | 13.587    | <0.001  | -118.574 | -64.560  |
| Week : COVID Phase (Interaction) | -2.742      | 0.740     | <0.001  | -4.213   | -1.270   |

**Supplementary material C: Coefficients of segmented interrupted time series analysis adjusted for season (note, data is centred around COVID impact)**

| term                             | Coefficient | std.error | p.value | Lower CI | Upper CI |
|----------------------------------|-------------|-----------|---------|----------|----------|
| (Intercept)                      | 264.549     | 5.323     | <0.001  | 253.967  | 275.132  |
| Week                             | 0.096       | 0.143     | 0.505   | -0.189   | 0.380    |
| Covid Phase                      | -99.727     | 9.274     | <0.001  | -118.163 | -81.290  |
| Season                           | -123.535    | 12.222    | <0.001  | -147.831 | -99.240  |
| Week : COVID Phase (Interaction) | -2.813      | 0.503     | <0.001  | -3.814   | -1.812   |

**Supplementary material D: COM-VID study demographic characteristics for Health Links eligible cohort and sub-sample of interview participants**

|                                                                                              | Interview participants<br>(n = 200) | Health Links eligible cohort 2019<br>(n = 4,868) |
|----------------------------------------------------------------------------------------------|-------------------------------------|--------------------------------------------------|
| Age (SD)                                                                                     | 66.4 (15.6)                         | 66.9 (17.5)                                      |
| Gender                                                                                       |                                     |                                                  |
| Male                                                                                         | 103 (52%)                           | 2,282 (47%)                                      |
| Female                                                                                       | 97 (49%)                            | 2,586 (53%)                                      |
| Spoken Language                                                                              |                                     |                                                  |
| English Speaking                                                                             | 85 (43%)                            | 3,454 (71%)                                      |
| Non-English Speaking                                                                         | 115 (58%)                           | 1,414 (29%)                                      |
| Primary Language                                                                             |                                     |                                                  |
| Southern European (Italian, Greek,<br>Turkish, Maltese, Macedonian)                          | 54 (27%)                            | 901 (19%)                                        |
| West Asian/ Middle Eastern (Arabic,<br>Assyrian/ Chaldean Neo-<br>Aramaic, Persian)          | 43 (22%)                            | 295 (6%)                                         |
| East, South and South-East Asia<br>(Hindi, Urdu, Punjabi, Mandarin,<br>Vietnamese, Nepalese) | 19 (9%)                             | 59 (1%)                                          |
